# Supplementary material for: Long-term outcome of stereotactic aspiration, endoscopic evacuation, and open craniotomy for the treatment of spontaneous basal ganglia hemorrhage: a propensity score study of 703 cases
Source: PubMed Central journal article supplement — Ann Transl Med. 2021 Aug;9(16):1289. doi: 10.21037/atm-21-1612 (PMC8422088; doi:10.21037/atm-21-1612), 2021-08
Supplement: atm-09-16-1289-supplementary.pdf [file atm-09-16-1289-supplementary.pdf]

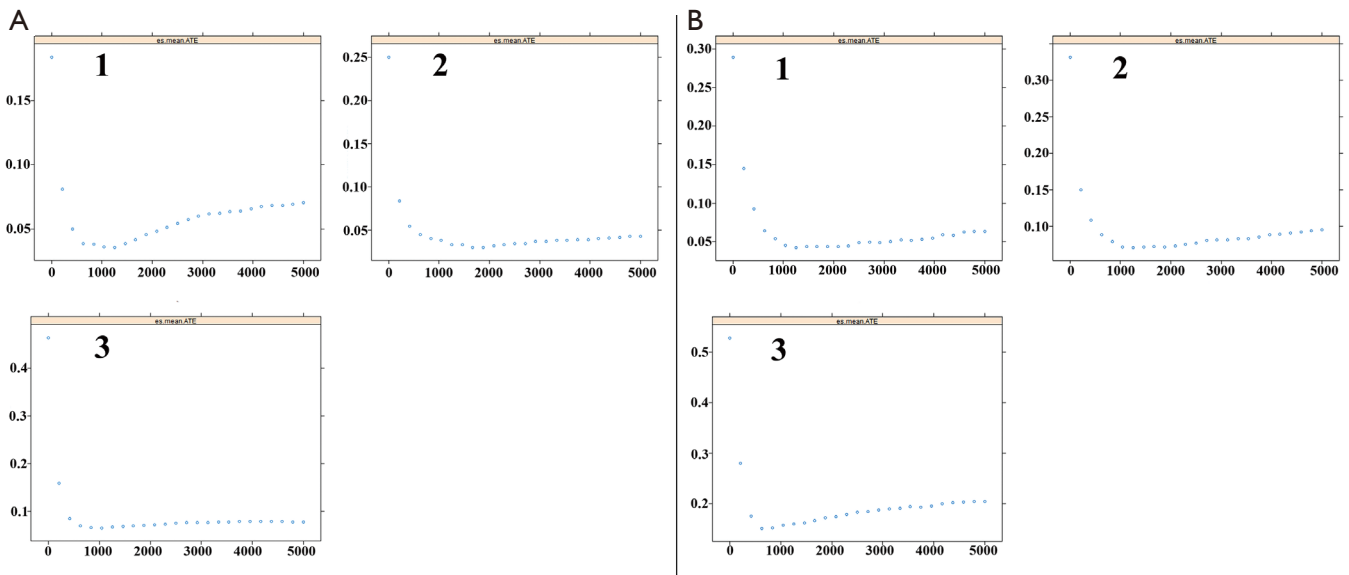

**Figure S1** For the entire cohort, generalized boosted model to obtain the optimal balance of the propensity score among groups of the IPTW model associated with mRS score (A) and mortality rates (B). Horizontal axis represents the iteration times and vertical axis represents the balance measure. 1, Balance for EE against others. 2, Balance for SA against others. 3, Balance for OC against others. IPTW, inverse probability of treatment weighted; mRS, modified Rankin Scale; SA, stereotactic aspiration; EE, endoscopic evacuation; OC, open craniotomy.

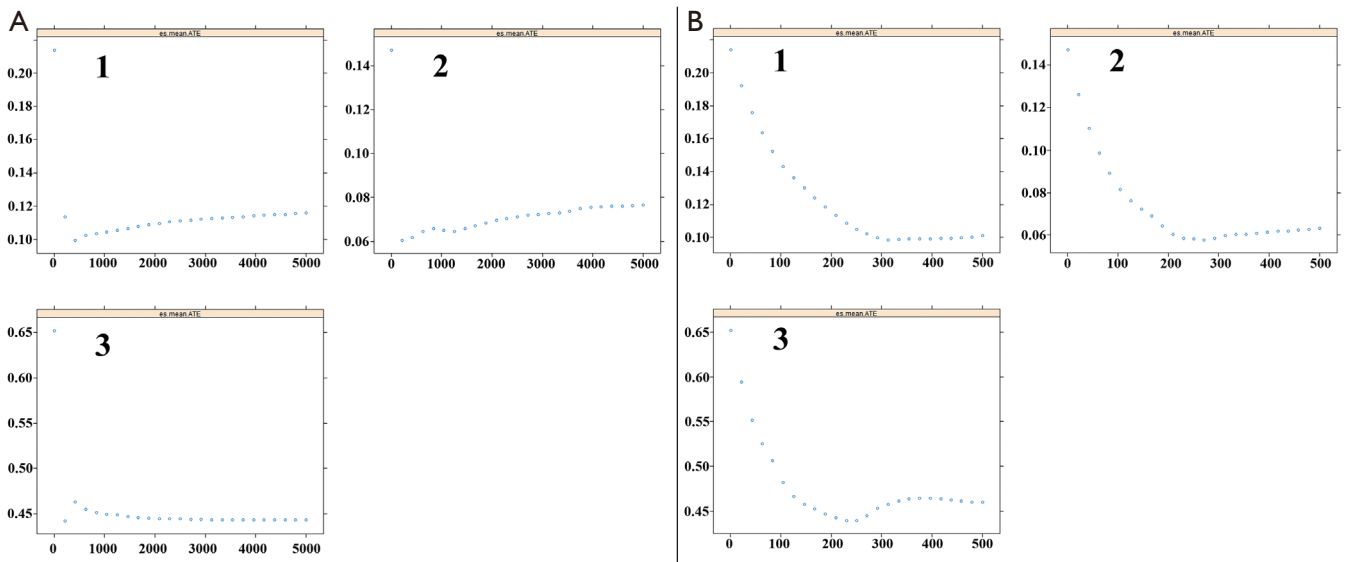

**Figure S2** For the subgroup of hematoma volume of 20–40 mL, generalized boosted model to obtain the optimal balance of the propensity score among groups of the IPTW model associated with mRS score (A) and mortality rates (B). Horizontal axis represents the iteration times and vertical axis represents the balance measure. 1, Balance for EE against others. 2, Balance for SA against others. 3, Balance for OC against others. IPTW, inverse probability of treatment weighted; mRS, modified Rankin Scale; SA, stereotactic aspiration; EE, endoscopic evacuation; OC, open craniotomy.

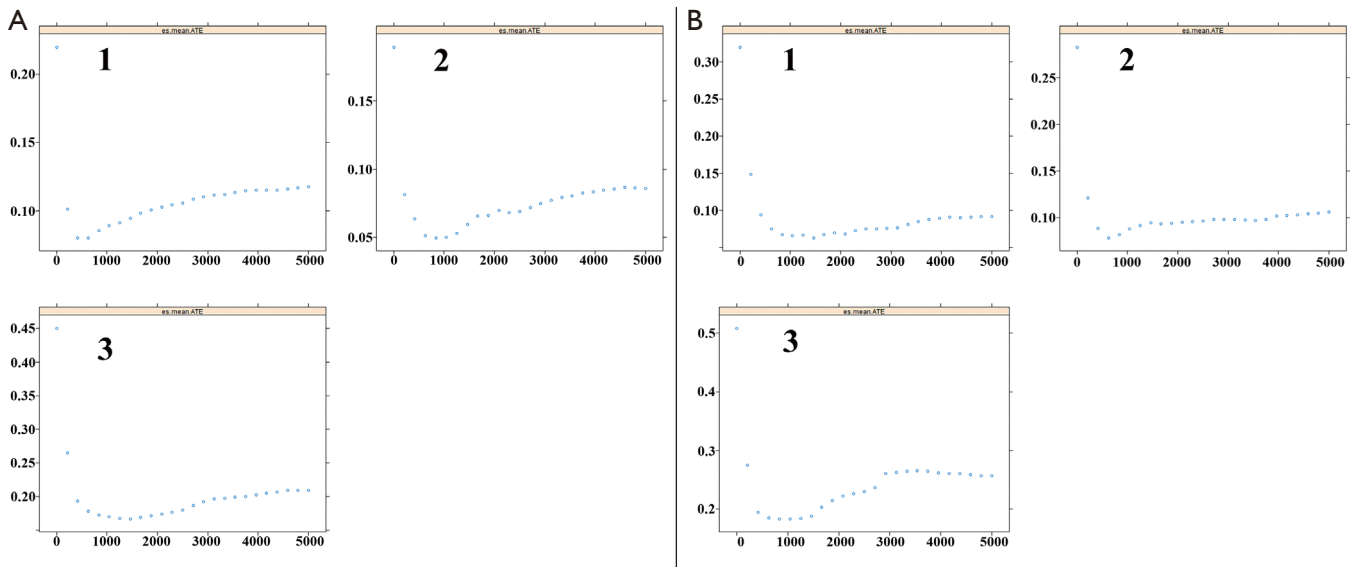

**Figure S3** For the subgroup of hematoma volume of 40–80 mL, generalized boosted model to obtain the optimal balance of the propensity score among groups of the IPTW model associated with mRS score (A) and mortality rates (B). Horizontal axis represents the iteration times and vertical axis represents the balance measure. 1, Balance for EE against others. 2, Balance for SA against others. 3, Balance for OC against others. IPTW, inverse probability of treatment weighted; mRS, modified Rankin Scale; SA, stereotactic aspiration; EE, endoscopic evacuation; OC, open craniotomy.

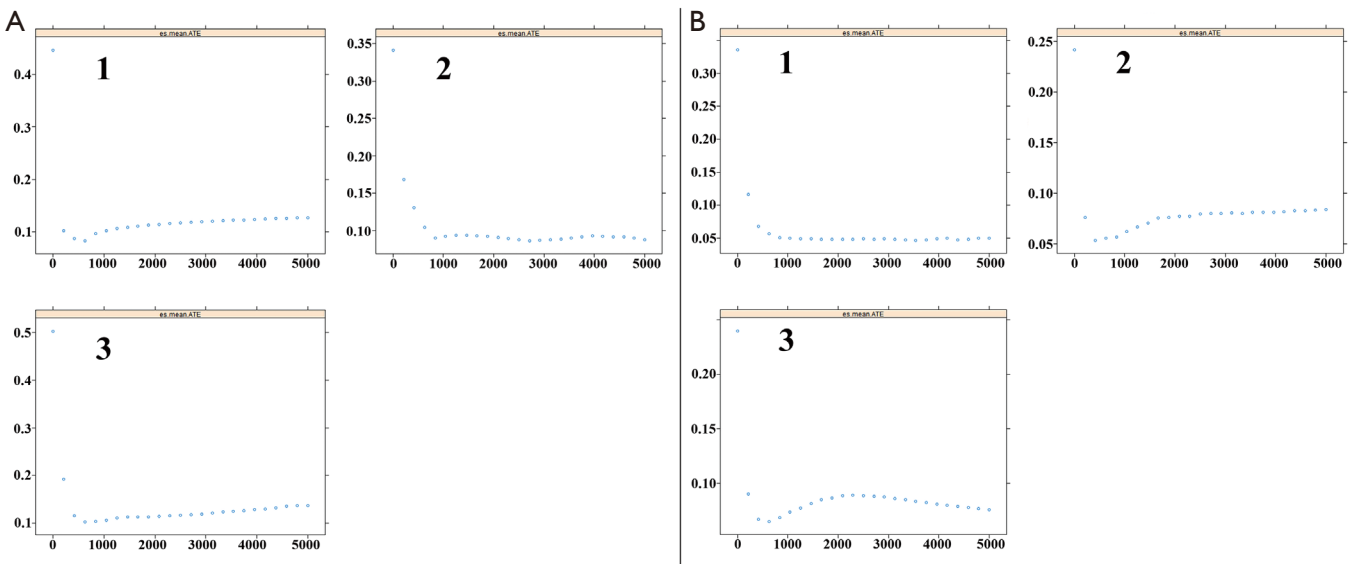

**Figure S4** For the subgroup of hematoma volume of  $\geq 80$  mL, generalized boosted model to obtain the optimal balance of the propensity score among groups of the IPTW model associated with mRS score (A) and mortality rates (B). Horizontal axis represents the iteration times and vertical axis represents the balance measure. 1, Balance for EE against others. 2, Balance for SA against others. 3, Balance for OC against others. IPTW, inverse probability of treatment weighted; mRS, modified Rankin Scale; SA, stereotactic aspiration; EE, endoscopic evacuation; OC, open craniotomy.

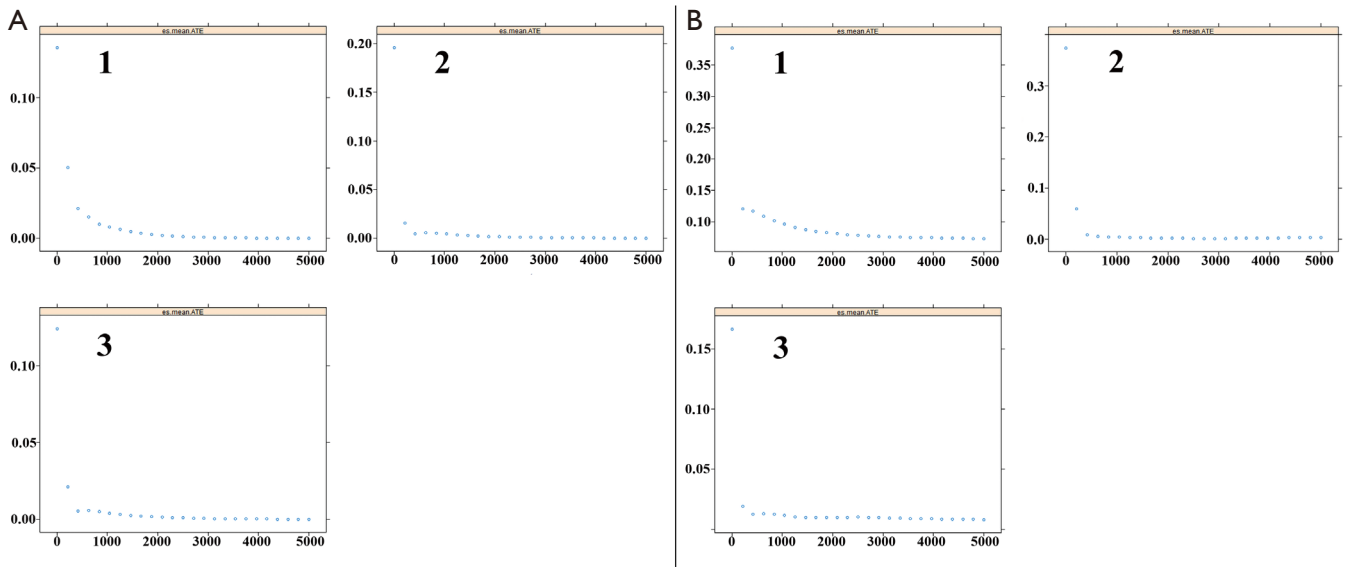

**Figure S5** For the subgroup of Glasgow Coma Scale score 3–5, generalized boosted model to obtain the optimal balance of the propensity score among groups of the IPTW model associated with mRS score (A) and mortality rates (B). Horizontal axis represents the iteration times and vertical axis represents the balance measure. 1, Balance for EE against others. 2, Balance for SA against others. 3, Balance for OC against others. IPTW, inverse probability of treatment weighted; mRS, modified Rankin Scale; SA, stereotactic aspiration; EE, endoscopic evacuation; OC, open craniotomy.

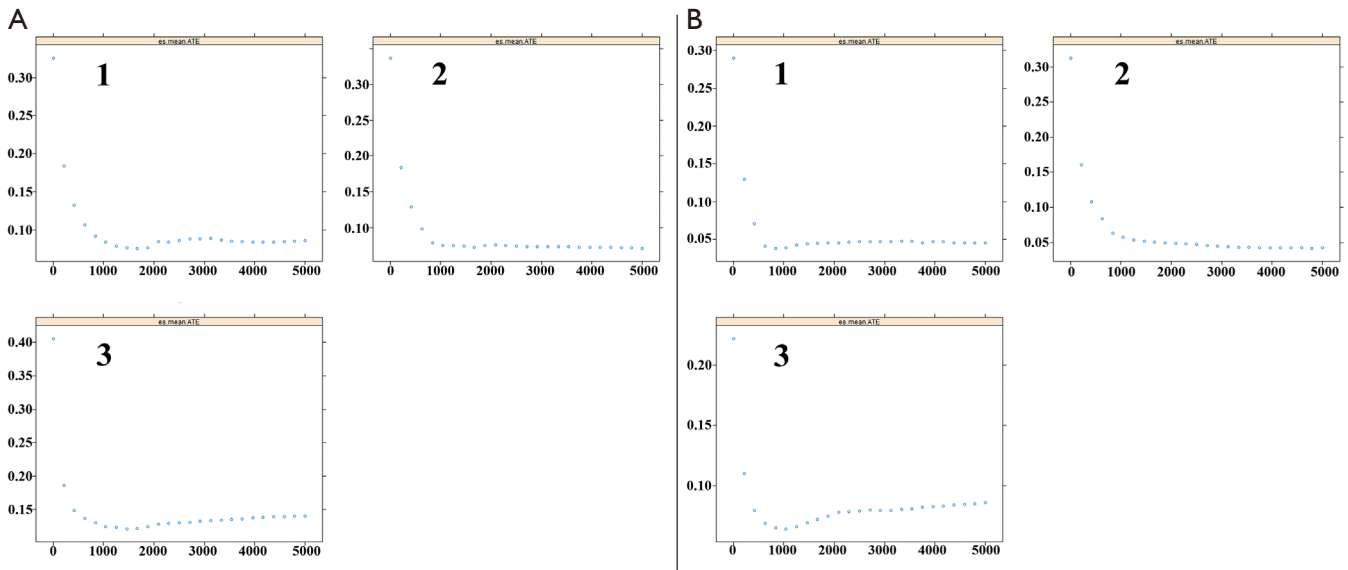

**Figure S6** For the subgroup of Glasgow Coma Scale score 6–8, generalized boosted model to obtain the optimal balance of the propensity score among groups of the IPTW model associated with mRS score (A) and mortality rates (B). Horizontal axis represents the iteration times and vertical axis represents the balance measure. 1, Balance for EE against others. 2, Balance for SA against others. 3, Balance for OC against others. IPTW, inverse probability of treatment weighted; mRS, modified Rankin Scale; SA, stereotactic aspiration; EE, endoscopic evacuation; OC, open craniotomy.

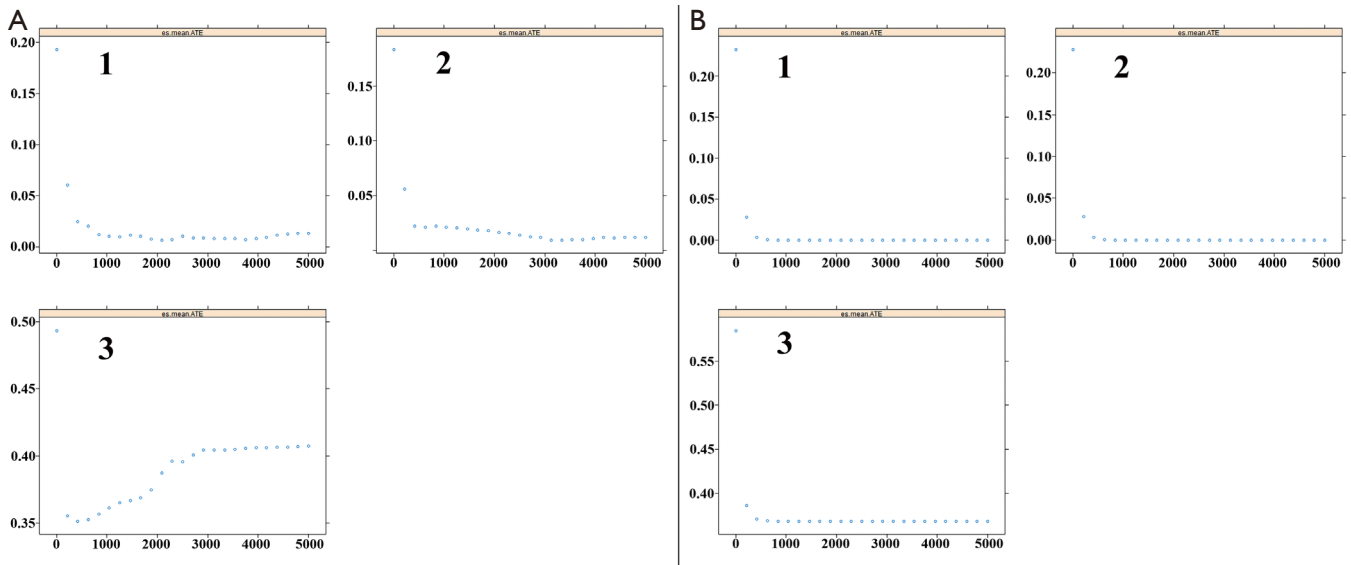

**Figure S7** For the subgroup of Glasgow Coma Scale score 9–14, generalized boosted model to obtain the optimal balance of the propensity score among groups of the IPTW model associated with mRS score (A) and mortality rates (B). Horizontal axis represents the iteration times and vertical axis represents the balance measure. 1, Balance for EE against others. 2, Balance for SA against others. 3, Balance for OC against others. IPTW, inverse probability of treatment weighted; mRS, modified Rankin Scale; SA, stereotactic aspiration; EE, endoscopic evacuation; OC, open craniotomy.

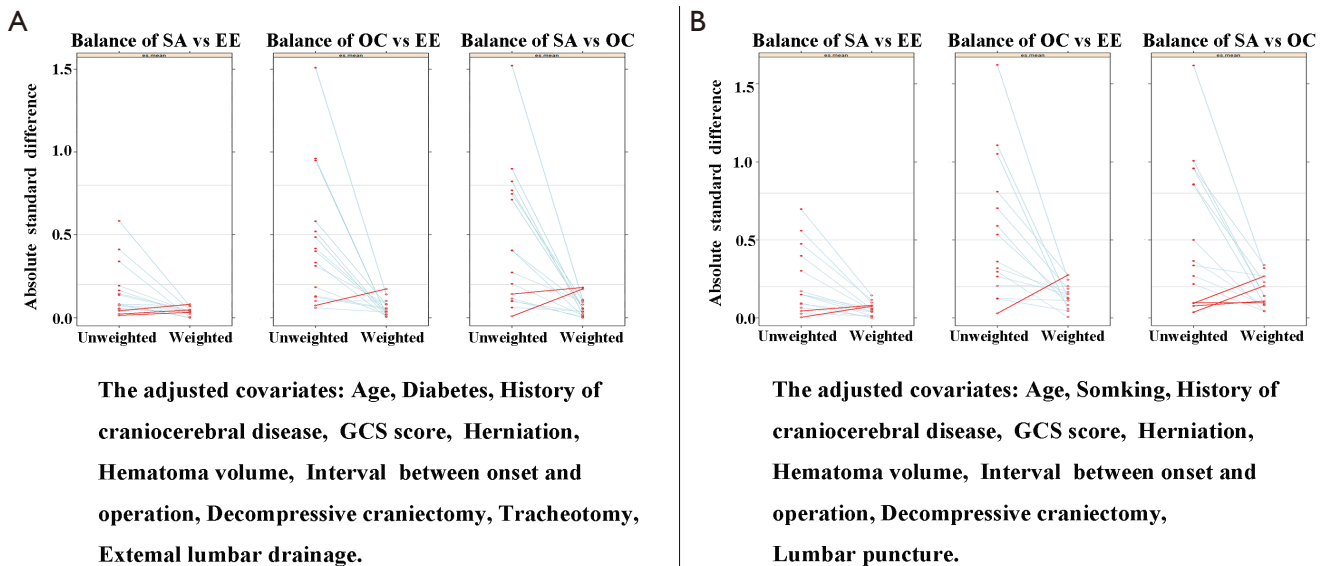

**Figure S8** For the entire cohort, results of the standardized mean differences to evaluate the effect of weights on the magnitude of each confounding factors of the IPTW model associated with mRS score (A) and mortality rates (B). IPTW, inverse probability of treatment weighted; mRS, modified Rankin Scale; SA, stereotactic aspiration; EE, endoscopic evacuation; OC, open craniotomy; GCS, Glasgow Coma Scale.

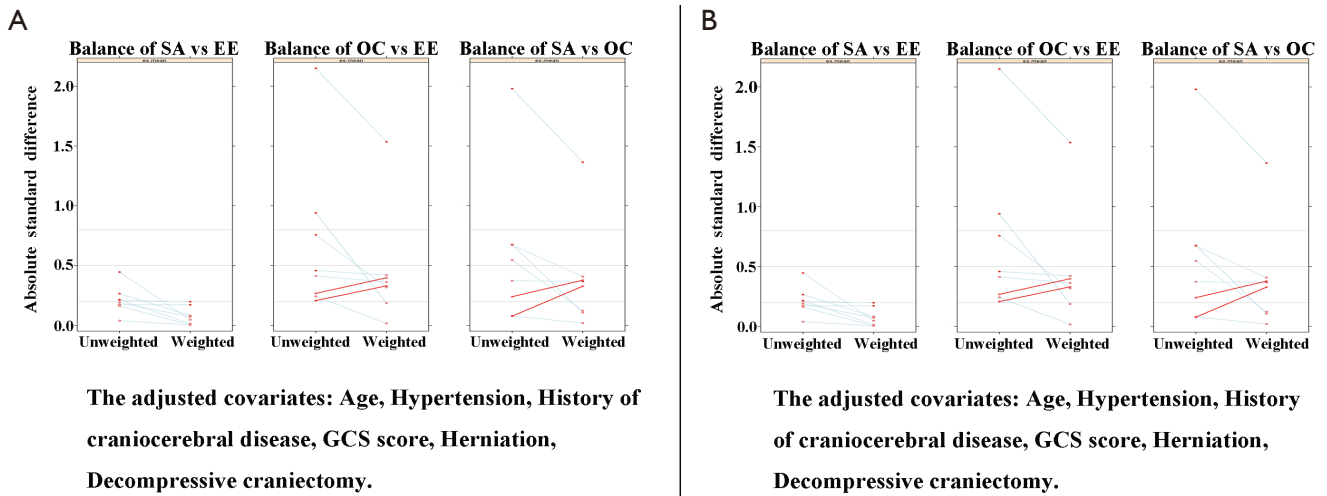

**Figure S9** For the subgroup of hematoma volume of 20–40 mL, results of the standardized mean differences to evaluate the effect of weights on the magnitude of each confounding factors of the IPTW model associated with mRS score (A) and mortality rates (B). IPTW, inverse probability of treatment weighted; mRS, modified Rankin Scale; SA, stereotactic aspiration; EE, endoscopic evacuation; OC, open craniotomy; GCS, Glasgow Coma Scale.

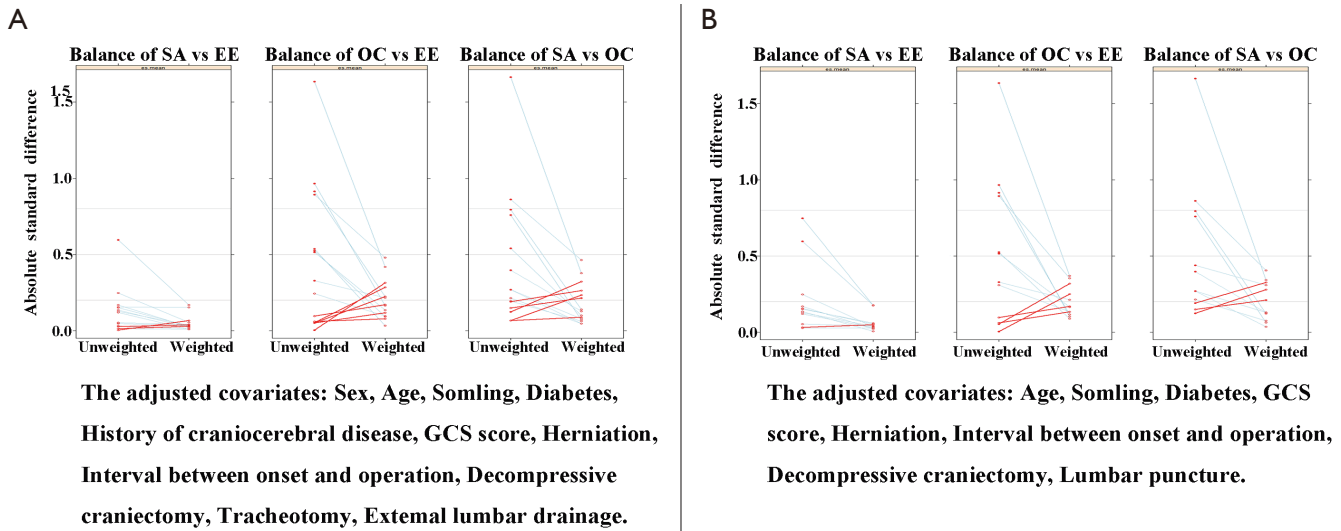

**Figure S10** For the subgroup of hematoma volume of 40–80 mL, results of the standardized mean differences to evaluate the effect of weights on the magnitude of each confounding factors of the IPTW model associated with mRS score (A) and mortality rates (B). IPTW, inverse probability of treatment weighted; mRS, modified Rankin Scale; SA, stereotactic aspiration; EE, endoscopic evacuation; OC, open craniotomy; GCS, Glasgow Coma Scale.

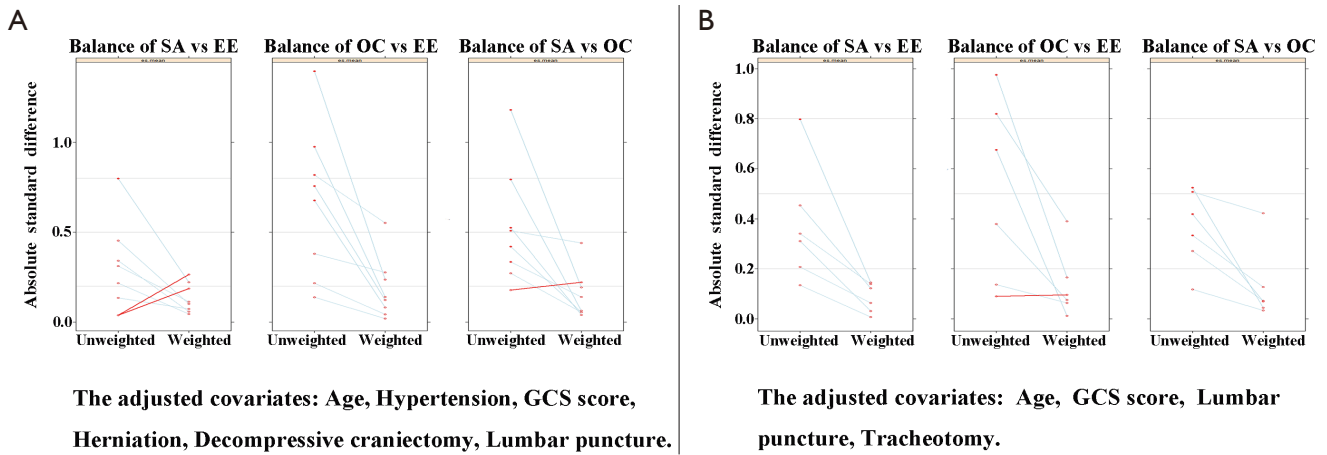

**Figure S11** For the subgroup of hematoma volume of  $\geq 80$  mL, results of the standardized mean differences to evaluate the effect of weights on the magnitude of each confounding factors of the IPTW model associated with mRS score (A) and mortality rates (B). IPTW, inverse probability of treatment weighted; mRS, modified Rankin Scale; SA, stereotactic aspiration; EE, endoscopic evacuation; OC, open craniotomy; GCS, Glasgow Coma Scale.

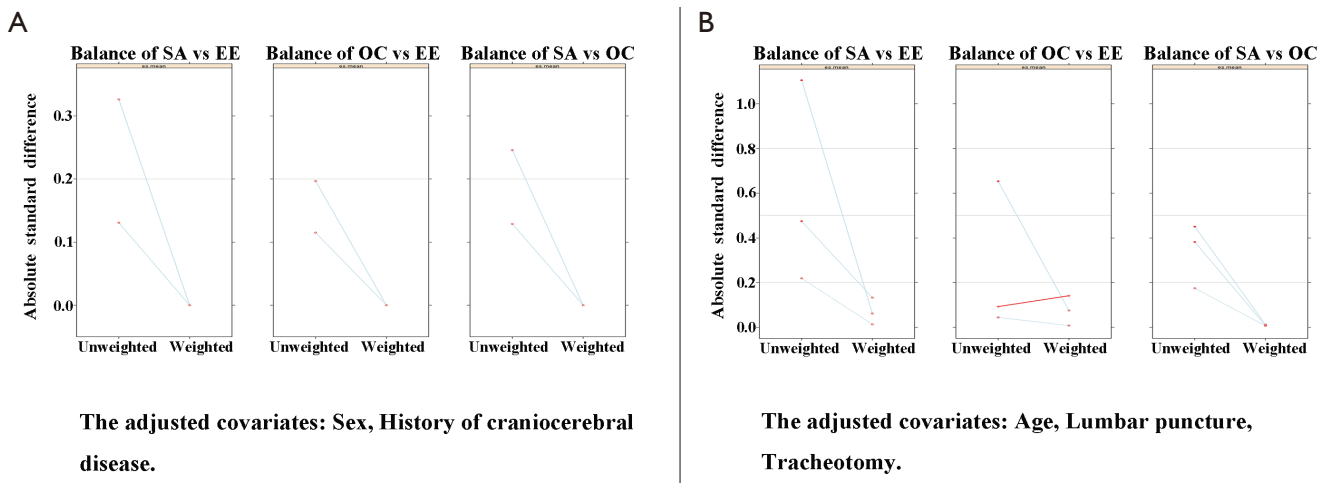

**Figure S12** For the subgroup of Glasgow Coma Scale score 3–5, results of the standardized mean differences to evaluate the effect of weights on the magnitude of each confounding factors of the IPTW model associated with mRS score (A) and mortality rates (B). IPTW, inverse probability of treatment weighted; mRS, modified Rankin Scale; SA, stereotactic aspiration; EE, endoscopic evacuation; OC, open craniotomy.

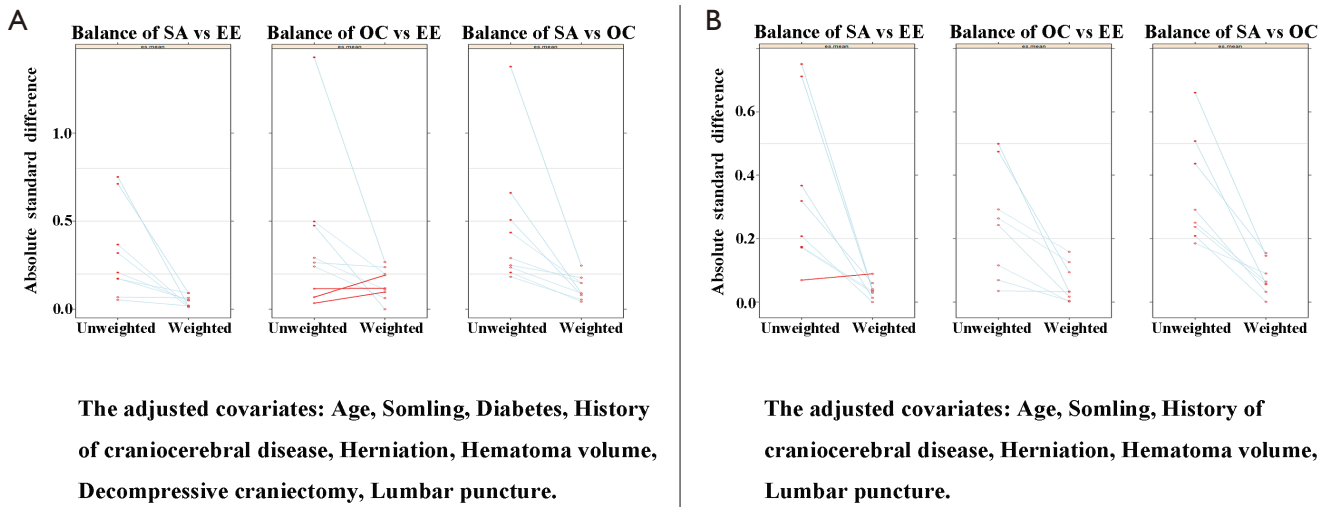

**Figure S13** For the subgroup of Glasgow Coma Scale score 6–8, results of the standardized mean differences to evaluate the effect of weights on the magnitude of each confounding factors of the IPTW model associated with mRS score (A) and mortality rates (B). IPTW, inverse probability of treatment weighted; mRS, modified Rankin Scale; SA, stereotactic aspiration; EE, endoscopic evacuation; OC, open craniotomy.

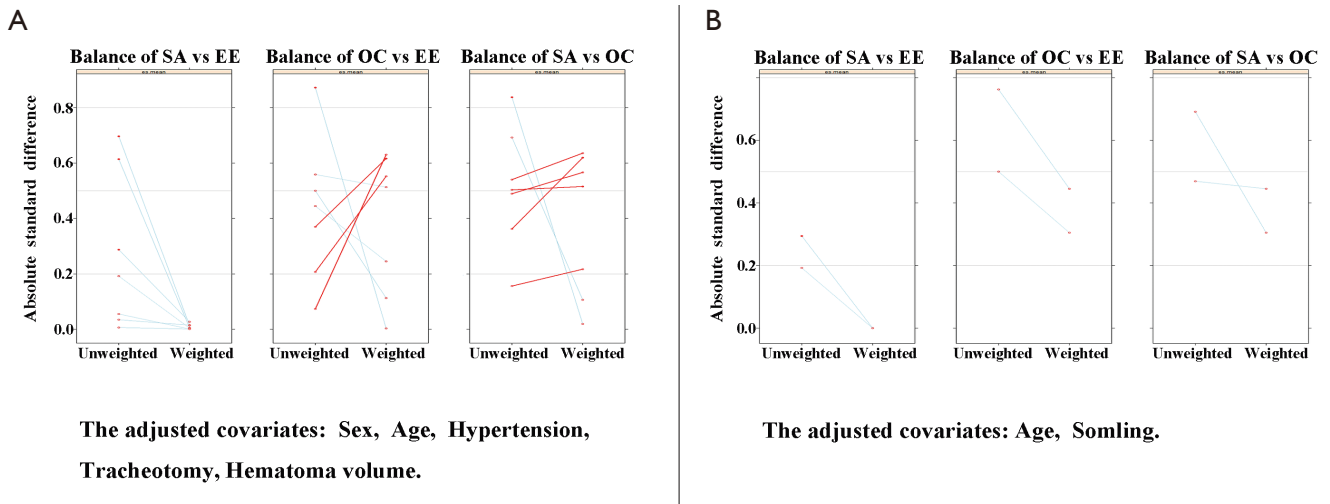

**Figure S14** For the subgroup of Glasgow Coma Scale score 9–14, results of the standardized mean differences to evaluate the effect of weights on the magnitude of each confounding factors of the IPTW model associated with mRS score (A) and mortality rates (B). IPTW, inverse probability of treatment weighted; mRS, modified Rankin Scale; SA, stereotactic aspiration; EE, endoscopic evacuation; OC, open craniotomy.

**Table S1** The inter-group balance tests of possible confounding factors among different surgical techniques in different hematoma volume subgroups

| Characteristic                               | Classification | Hematoma volume (20–40 mL) |              |             |            |          | Hematoma volume (40–80 mL) |              |              |             |          | Hematoma volume (≥80 ml) |             |             |             |          |
|----------------------------------------------|----------------|----------------------------|--------------|-------------|------------|----------|----------------------------|--------------|--------------|-------------|----------|--------------------------|-------------|-------------|-------------|----------|
|                                              |                | Total (n=195)              | SA (n=151)   | EE (n=38)   | OC (n=6)   | P value  | Total (n=353)              | SA (n=149)   | EE (n=134)   | OC (n=70)   | P value  | Total (n=155)            | SA (n=43)   | EE (n=40)   | OC (n=72)   | P value  |
| Sex                                          | Male           | 112 (57.44%)               | 90 (59.60%)  | 19 (50.00%) | 3 (50.00%) | 0.5259   | 212 (60.06%)               | 91 (61.07%)  | 85 (63.43%)  | 36 (51.43%) | 0.2377   | 122 (78.71%)             | 31 (72.09%) | 31 (77.50%) | 60 (83.33%) | 0.3540   |
| Age (years)                                  | >60            | 55 (58.21%)                | 45 (29.80%)  | 8 (21.05%)  | 2 (33.33%) | 0.5412   | 146 (41.36%)               | 69 (46.31%)  | 52 (38.81%)  | 25 (35.71%) | 0.2485   | 60 (38.71%)              | 20 (46.51%) | 16 (40.00%) | 24 (33.33%) | 0.3663   |
| GCS score                                    | 3–5            | 20 (10.26%)                | 17 (11.26%)  | 1 (2.63%)   | 2 (33.33%) | 0.0281*  | 64 (18.13%)                | 21 (14.09%)  | 9 (6.72%)    | 34 (48.57%) | <0.0001* | 92 (59.35%)              | 23 (53.49%) | 13 (32.50%) | 56 (77.78%) | <0.0001* |
|                                              | 5–8            | 53 (27.18%)                | 35 (23.18%)  | 16 (42.11%) | 2 (33.33%) |          | 152 (43.06%)               | 59 (39.60%)  | 61 (45.52%)  | 32 (45.71%) |          | 53 (34.19%)              | 16 (37.21%) | 21 (52.50%) | 16 (22.22%) |          |
|                                              | 9–14           | 122 (62.56%)               | 99 (65.56%)  | 21 (55.26%) | 2 (33.33%) |          | 137 (38.81%)               | 69 (46.31%)  | 64 (47.76%)  | 4 (5.71%)   |          | 10 (6.45%)               | 4 (9.30%)   | 6 (15.00%)  | 0 (0.00%)   |          |
| Smoking                                      | Yes            | 114 (58.56%)               | 93 (61.59%)  | 18 (47.37%) | 3 (50.00%) | 0.2578   | 210 (59.49%)               | 108 (72.48%) | 60 (44.78%)  | 42 (60.00%) | <0.0001* | 84 (54.19%)              | 31 (72.09%) | 17 (42.50%) | 36 (50.00%) | 0.0161*  |
| Diabetes                                     | Yes            | 13 (6.67%)                 | 12 (7.95%)   | 1 (2.63%)   | 0 (0.00%)  | 0.4024   | 24 (6.80%)                 | 12 (8.05%)   | 9 (6.72%)    | 3 (4.29%)   | 0.5858   | 11 (7.10%)               | 3 (6.98%)   | 4 (10.00%)  | 4 (5.56%)   | 0.6799   |
| Hypertension                                 | Yes            | 154 (78.97%)               | 121 (80.13%) | 28 (73.68%) | 5 (83.33%) | 0.6600   | 292 (82.72%)               | 125 (83.89%) | 112 (83.58%) | 55 (78.57%) | 0.5898   | 129 (83.23%)             | 37 (86.05%) | 35 (87.50%) | 57 (79.17%) | 0.4452   |
| History of craniocerebral disease            | Yes            | 23 (11.79%)                | 18 (11.92%)  | 5 (13.16%)  | 0 (0.00%)  | 0.6465   | 40 (11.33%)                | 16 (10.74%)  | 15 (11.19%)  | 9 (12.86%)  | 0.8972   | 26 (16.77%)              | 8 (18.60%)  | 4 (10.00%)  | 14 (19.44%) | 0.4095   |
| Herniation                                   | Yes            | 8 (4.10) %                 | 7 (4.64%)    | 0 (0.00%)   | 1 (16.67%) | 0.1260   | 51 (14.45%)                | 16 (10.74%)  | 6 (4.48%)    | 29 (41.43%) | <0.0001* | 69 (44.52%)              | 11 (25.28%) | 11 (27.50%) | 47 (65.28%) | <0.0001* |
| Interval between onset and operation (hours) | <12 hours      | 70 (35.90%)                | 58 (38.41%)  | 10 (26.32%) | 2 (33.33%) | <0.0001* | 157 (44.48%)               | 64 (42.59%)  | 49 (36.57%)  | 44 (62.86%) | 0.0025*  | 114 (73.55%)             | 31 (72.09%) | 26 (65.00%) | 57 (79.17%) | 0.4942   |
|                                              | 12–24 hours    | 82 (42.05%)                | 62 (41.06%)  | 19 (50.00%) | 1 (16.67%) |          | 137 (38.81%)               | 55 (36.91%)  | 65 (48.51%)  | 17 (24.29%) |          | 35 (22.58%)              | 11 (25.58%) | 12 (30.00%) | 12 (16.67%) |          |
|                                              | ≥24 hours      | 43 (22.05%)                | 31 (20.53%)  | 9 (23.68%)  | 3 (50.00%) |          | 59 (16.71%)                | 30 (20.13%)  | 20 (14.93%)  | 9 (12.86%)  |          | 6 (3.87%)                | 1 (2.33%)   | 2 (5.00%)   | 3 (4.17%)   |          |
| Rehabilitation treatment                     | PRT            | 96 (49.23%)                | 73 (48.34%)  | 18 (47.37%) | 5 (83.33%) | 0.0584   | 146 (41.36%)               | 52 (34.90%)  | 67 (50.00%)  | 27 (38.57%) | 0.0002*  | 42 (27.10%)              | 6 (13.95%)  | 16 (40.00%) | 20 (27.78%) | 0.0003*  |
|                                              | NPRT           | 46 (23.59%)                | 31 (20.53%)  | 15 (39.47%) | 0 (0.00%)  |          | 86 (24.36%)                | 39 (26.17%)  | 34 (25.37%)  | 13 (18.57%) |          | 20 (12.90%)              | 4 (9.30%)   | 9 (22.50%)  | 7 (9.72%)   |          |
|                                              | NRT            | 23 (11.79%)                | 20 (13.25%)  | 3 (7.89%)   | 0 (0.00%)  |          | 27 (7.65%)                 | 8 (5.37%)    | 16 (11.94%)  | 3 (4.29%)   |          | 19 (12.26%)              | 1 (2.33%)   | 6 (15.00%)  | 12 (16.67%) |          |
|                                              | mortality      | 30 (15.38%)                | 27 (17.88%)  | 2 (5.26%)   | 1 (16.67%) |          | 94 (26.63%)                | 50 (33.56%)  | 17 (12.67%)  | 27 (38.57%) |          | 74 (47.74%)              | 32 (74.42%) | 9 (22.50%)  | 33 (45.83%) |          |
| Decompressive craniectomy                    | Yes            | 9 (4.62%)                  | 6 (3.97%)    | 0 (0.00%)   | 3 (50.00%) | <0.0001* | 71 (20.11%)                | 7 (4.70%)    | 8 (5.97%)    | 56 (80.00%) | <0.0001* | 80 (51.61%)              | 12 (27.91%) | 7 (37.50%)  | 61 (84.72%) | <0.0001* |
| Tracheotomy                                  | Yes            | 27 (13.94%)                | 21 (13.91%)  | 5 (13.16%)  | 1 (16.67%) | 0.9726   | 68 (19.26%)                | 22 (14.77%)  | 20 (14.93%)  | 26 (37.14%) | 0.0001*  | 51 (32.90%)              | 12 (27.91%) | 15 (37.50%) | 24 (33.33%) | 0.6456   |
| Lumbar puncture                              | Yes            | 52 (26.67%)                | 32 (21.19%)  | 18 (47.37%) | 2 (33.33%) | 0.0046*  | 111 (31.44%)               | 24 (16.11%)  | 63 (47.01%)  | 24 (34.29%) | <0.0001* | 44 (28.39%)              | 5 (11.63%)  | 18 (45.00%) | 21 (29.17%) | 0.0034*  |
| External lumbar drainage                     | Yes            | 16 (8.21%)                 | 12 (7.95%)   | 4 (10.53%)  | 0 (0.00%)  | 0.6632   | 40 (11.33%)                | 16 (10.74%)  | 15 (11.19%)  | 9 (12.86%)  | 0.8972   | 22 (14.19%)              | 7 (16.28%)  | 7 (17.50%)  | 8 (11.11%)  | 0.5844   |
| Re-operation                                 | Yes            | 11 (5.64%)                 | 9 (5.96%)    | 2 (5.26%)   | 0 (0.00%)  | 0.8196   | 14 (3.97%)                 | 8 (5.37%)    | 3 (2.24%)    | 3 (4.29%)   | 0.3988   | 10 (6.45%)               | 3 (6.98%)   | 1 (2.50%)   | 6 (8.33%)   | 0.4778   |

\*, The difference has statistical significance. SA, Stereotactic Aspiration; EE, Endoscopic Evacuation; OC, Open Craniotomy. GCS, Glasgow Coma Scale. PRT, Professional Rehabilitation Treatment, NPRT, Un-professional Rehabilitation Treatment, NRT, No Rehabilitation Treatment.



**Table S2** The inter-group balance tests of possible confounding factors among different surgical techniques in different GCS score subgroups.

| Characteristic                               | Classification | GCS 3-5       |             |             |             |          | GCS 6-8       |             |             |             |          | GCS 9-14      |              |             |             |         |
|----------------------------------------------|----------------|---------------|-------------|-------------|-------------|----------|---------------|-------------|-------------|-------------|----------|---------------|--------------|-------------|-------------|---------|
|                                              |                | Total (n=176) | SA (n=61)   | EE (n=23)   | OC (n=92)   | P value  | Total (n=258) | SA (n=110)  | EE (n=98)   | OC (n=50)   | P value  | Total (n=269) | SA (n=172)   | EE (n=91)   | OC (n=6)    | P value |
| Sex                                          | Male           | 116 (65.91%)  | 36 (59.02%) | 15 (65.22%) | 65 (70.65%) | 0.3302   | 151 (28.53%)  | 62 (56.36%) | 60 (61.22%) | 29 (58.00%) | 0.7743   | 179 (66.54%)  | 114 (66.28%) | 60 (65.93%) | 5 (83.33%)  | 0.6770  |
| Age (years)                                  | >60            | 62 (35.23%)   | 25 (40.98%) | 7 (30.43%)  | 30 (32.61%) | 0.4981   | 98 (37.98%)   | 51 (46.36%) | 30 (30.61%) | 17 (34.00%) | 0.0530   | 101 (37.55%)  | 58 (33.72%)  | 39 (42.86%) | 4 (66.67%)  | 0.1143  |
| Smoking                                      | Yes            | 103 (58.52%)  | 43 (70.49%) | 11 (47.83%) | 49 (53.26%) | 0.0569   | 154 (59.69%)  | 85 (77.27%) | 42 (42.86%) | 27 (54.00%) | <0.0001* | 151 (56.13%)  | 104 (60.47%) | 42 (46.15%) | 5 (83.33%)  | 0.0335* |
| Diabetes                                     | Yes            | 13 (7.39%)    | 7 (11.48%)  | 1 (4.35%)   | 5 (5.43%)   | 0.3145   | 21 (8.14%)    | 10 (9.09%)  | 9 (9.18%)   | 2 (4.00%)   | 0.4912   | 14 (5.20%)    | 10 (5.81%)   | 4 (4.40%)   | 0 (0.00%)   | 0.7484  |
| Hypertension                                 | Yes            | 145 (82.39%)  | 51 (83.61%) | 20 (86.96%) | 74 (80.43%) | 0.7279   | 215 (83.33%)  | 94 (85.45%) | 84 (85.71%) | 37 (74.00%) | 0.1428   | 215 (79.93%)  | 138 (80.23%) | 71 (78.02%) | 6 (100.00%) | 0.4226  |
| History of craniocerebral disease            | Yes            | 30 (17.05%)   | 13 (21.31%) | 2 (8.70%)   | 15 (16.30%) | 0.3763   | 31 (12.02%)   | 11 (10.00%) | 12 (12.24%) | 8 (16.00%)  | 0.5548   | 28 (10.41%)   | 18 (10.47%)  | 10 (10.99%) | 0 (0.00%)   | 0.6940  |
| Herniation                                   | Yes            | 105 (59.66%)  | 23 (37.70%) | 13 (56.52%) | 69 (75.00%) | <0.0001* | 17 (6.59%)    | 8 (7.27%)   | 1 (1.02%)   | 8 (16.00%)  | 0.0022*  | 6 (2.23%)     | 3 (1.74%)    | 3 (3.30%)   | 0 (0.00%)   | 0.6711  |
| Interval between onset and operation (hours) | <12 hours      | 128 (72.73%)  | 43 (70.49%) | 15 (65.22%) | 70 (76.09%) | 0.8329   | 132 (51.16%)  | 56 (50.91%) | 46 (46.94%) | 30 (60.00%) | 0.3070   | 81 (30.11%)   | 54 (31.40%)  | 24 (26.37%) | 3 (50.00%)  | 0.4942  |
|                                              | 12–24 hours    | 36 (20.45%)   | 14 (22.95%) | 6 (26.09%)  | 16 (17.39%) |          | 91 (35.27%)   | 38 (34.55%) | 41 (41.84%) | 12 (24.00%) |          | 127 (47.21%)  | 76 (44.19%)  | 49 (53.85%) | 2 (33.33%)  |         |
|                                              | ≥24 hours      | 12 (6.82%)    | 4 (6.56%)   | 2 (8.70%)   | 6 (6.52%)   |          | 35 (13.57%)   | 16 (14.55%) | 11 (11.22%) | 8 (16.00%)  |          | 61 (22.68%)   | 42 (24.42%)  | 18 (19.78%) | 1 (16.67%)  |         |
| Hematoma volume (mL)                         | ≥20–40         | 20 (11.36%)   | 17 (27.87%) | 1 (4.35%)   | 2 (2.17%)   | <0.0001* | 53 (20.54%)   | 35 (31.82%) | 16 (16.33%) | 2 (4.00%)   | 0.0004*  | 122 (45.35%)  | 99 (57.56%)  | 21 (23.08%) | 2 (33.33%)  | <0.001* |
|                                              | ≥40–80         | 64 (36.36%)   | 21 (34.43%) | 9 (39.13%)  | 34 (36.69%) |          | 152 (58.91%)  | 59 (53.64%) | 61 (62.24%) | 32 (64.00%) |          | 137 (50.93%)  | 69 (40.12%)  | 64 (70.33%) | 4 (66.67%)  |         |
|                                              | ≥80            | 92 (52.27%)   | 23 (37.70%) | 13 (56.52%) | 56 (60.87%) |          | 53 (20.54%)   | 16 (14.55%) | 21 (21.43%) | 16 (32.00%) |          | 10 (3.72%)    | 4 (2.33%)    | 6 (6.59%)   | 0 (0.00%)   |         |
| Rehabilitation treatment                     | PRT            | 52 (29.55%)   | 15 (24.59%) | 10 (43.48%) | 27 (29.35%) | 0.0027*  | 104 (40.31%)  | 36 (32.73%) | 46 (46.94%) | 22 (44.00%) | 0.0014*  | 128 (47.58%)  | 80 (46.51%)  | 45 (49.45%) | 3 (50.00%)  | 0.9372  |
|                                              | NPRT           | 17 (9.66%)    | 0 (0.00%)   | 5 (21.74%)  | 12 (13.04%) |          | 55 (21.32%)   | 22 (20.00%) | 27 (27.55%) | 6 (12.00%)  |          | 80 (29.74%)   | 52 (30.23%)  | 26 (28.57%) | 2 (33.33%)  |         |
|                                              | NRT            | 16 (9.09%)    | 4 (6.56%)   | 2 (8.70%)   | 10 (10.87%) |          | 25 (9.69%)    | 8 (7.27%)   | 12 (12.24%) | 5 (10.00%)  |          | 28 (10.41%)   | 17 (9.88%)   | 11 (12.09%) | 0 (0.00%)   |         |
| mortality                                    |                | 91 (51.70%)   | 42 (68.85%) | 6 (26.09%)  | 43 (46.74%) |          | 74 (28.68%)   | 44 (40.00%) | 13 (13.27%) | 17 (34.00%) |          | 33 (12.27%)   | 23 (13.37%)  | 9 (9.89%)   | 1 (16.67%)  |         |
| Decompressive craniectomy                    | Yes            | 107 (60.80%)  | 13 (21.31%) | 11 (47.83%) | 83 (90.22%) | <0.0001* | 44 (17.05%)   | 7 (6.36%)   | 4 (4.08%)   | 33 (66.00%) | <0.0001* | 9 (3.35%)     | 5 (2.91%)    | 0 (0.00%)   | 4 (66.67%)  | <0.001* |
| Tracheotomy                                  | Yes            | 59 (33.52%)   | 13 (21.31%) | 10 (43.48%) | 36 (39.13%) | 0.0407*  | 63 (24.42%)   | 27 (24.55%) | 23 (23.47%) | 13 (26.00%) | 0.9434   | 24 (8.92%)    | 15 (8.72%)   | 7 (7.69%)   | 2 (33.33%)  | 0.1014  |
| Lumbar puncture                              | Yes            | 52 (29.55%)   | 8 (13.11%)  | 14 (60.87%) | 30 (32.61%) | <0.0001* | 86 (33.33%)   | 22 (20.00%) | 49 (50.00%) | 15 (30.00%) | <0.0001* | 69 (25.65%)   | 31 (18.02%)  | 36 (39.56%) | 2 (33.33%)  | <0.001* |
| External lumbar drainage                     | Yes            | 27 (15.34%)   | 9 (14.75%)  | 7 (30.43%)  | 11 (11.96%) | 0.0879   | 34 (13.18%)   | 14 (12.73%) | 14 (14.29%) | 6 (12.00%)  | 0.9115   | 17 (6.32%)    | 12 (6.98%)   | 5 (5.49%)   | 0 (0.00%)   | 0.7280  |
| Re-operation                                 | Yes            | 16 (9.09%)    | 6 (9.84%)   | 2 (8.70%)   | 8 (8.70%)   | 0.9691   | 9 (3.49%)     | 5 (4.55%)   | 3 (3.06%)   | 1 (2.00%)   | 0.6883   | 10 (3.72%)    | 9 (5.23%)    | 1 (1.10%)   | 0 (0.00%)   | 0.2146  |

\*, The difference has statistical significance. SA, Stereotactic Aspiration; EE, Endoscopic Evacuation; OC, Open Craniotomy. GCS, Glasgow Coma Scale. PRT, Professional Rehabilitation Treatment, NPRT, Un-professional Rehabilitation Treatment, NRT, No Rehabilitation Treatment.

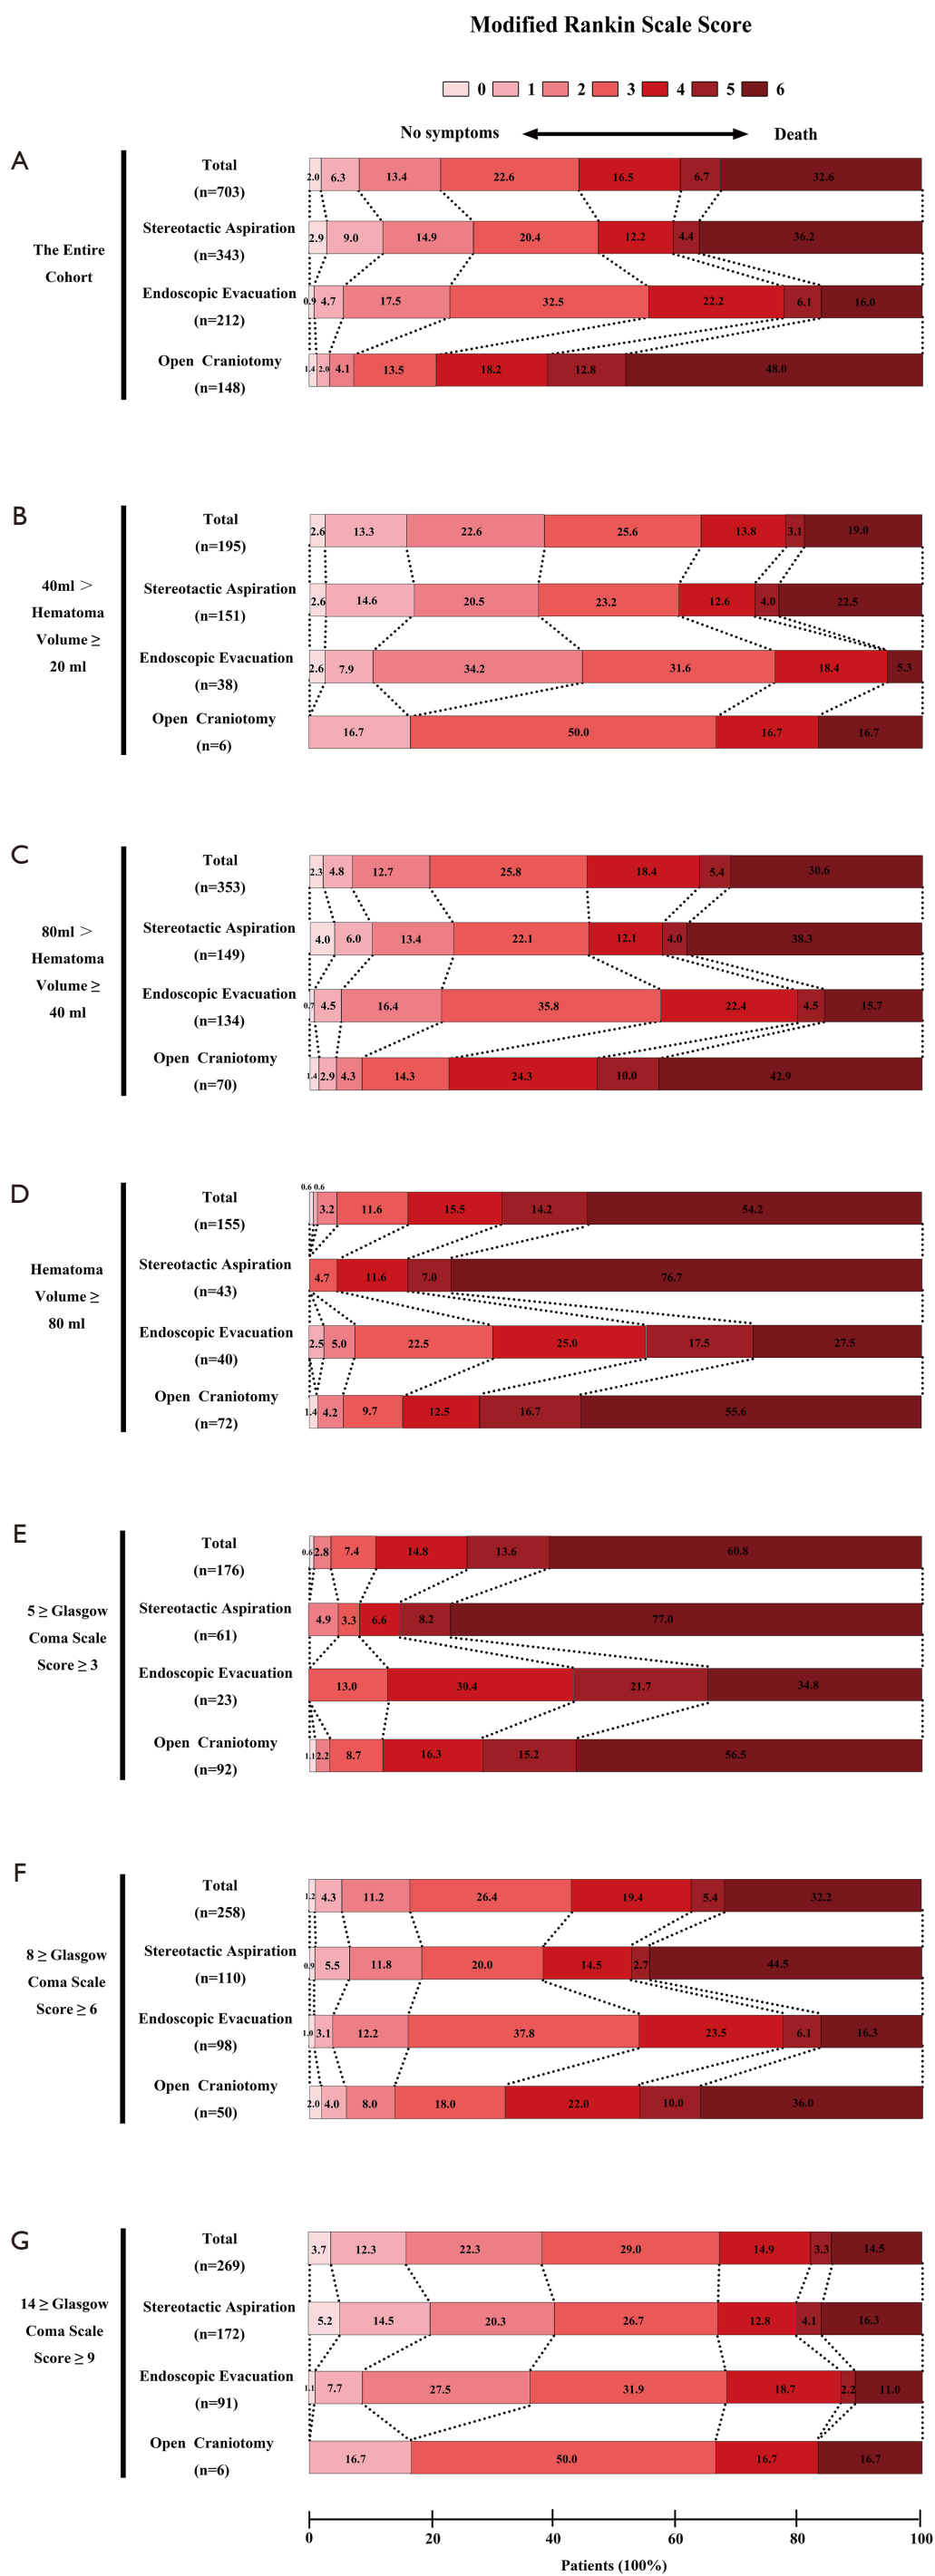

**Figure S15** Functional outcomes of patients in each group as assessed by modified Rankin Scale (mRS) score. The scores ranged from 0 to 6, with 0 indicating no symptoms; 1, no clinically significant disability; 2, slight disability; 3, moderate disability; 4, moderately severe disability; 5, severe disability; and 6, death. A score of 4–6 was recognized as a poor outcome. The percentages of patients by the score are shown in each cell. The mRS scores of (A) the entire cohort, (B) patients with a hematoma volume of 20–40 mL, (C) patients with hematoma volume of 40–80 mL, (D) patients with hematoma volume of ≥80 mL, (E) patients with GCS score 3–5, (F) patients with GCS score 6–8, (G) patients with GCS score 9–14. GCS, Glasgow Coma Scale.
